# Supplementary material
Source: Research Square preprint supplement (doi:10.21203/rs.3.rs-9082124/v1)
Supplement: Supplementary file 1 [file e42082654ca674f1ce2ca453.docx]

**Rare Special Breast Cancer Histologies in the ALTTO Trial: Outcomes and Central Histology Review**

**Data Supplements:**

- **Table S1.** Complete overview of histological diagnoses reclassification upon central pathological review.
- **Table S2.** Clinicopathological Features by Histological Subgroup.
- **Table S3.** DFS multivariate analysis.
- **Table S4.** TTDR Events by Histological Subgroup.
- **Figure S1.** CNS Relapse by Histological Subtype.
- **Figure S2.** TTDR by Histological Subtype.

**----------------------------------------------------------------------------------------------------------------------------------------------------------------**

**Table S1. Complete overview of histological diagnoses reclassification upon central pathological review.**

The table reports the absolute numbers of concordant and discordant diagnoses, showing how cases assigned to each histological subtype at local assessment (grey) were redistributed after central review (light blue).

| **Histological diagnosis according to initial local assessment** | **Final Histological diagnosis upon Central Pathological Review** | | | | | | | | | |
| --- | --- | --- | --- | --- | --- | --- | --- | --- | --- | --- |
| **APOCRINE** | **CRIBRIFORM** | **NST** | **INVASIVE NOS** | **ILC** | **MICROPAPILLARY** | **MIXED NST-ILC** | **MUCINOUS** | **METAPLASTIC** | **Total** |
| **APOCRINE** | 5 | - | 34 | - | - | - | - | - | - | 39 |
| **CRIBRIFORM & TUBULAR** | - | - | 8 | - | - | - | - | - | - | 8 |
| **CRIBRIFORM & NST** | 1 | - | 30 | 1 | - | - | - | - | - | 32 |
| **NST** | 64 | 1 | 4709 | 24 | 11 | 20 | 10 | 6 | 8 | 4853 |
| **APOCRINE & NST** | 2 | - | 3 | - | - | - | - | - | - | 5 |
| **HISTOLOGY: MISSING** | - | - | 1 | - | - | - | - | - | - | 1 |
| **ILC** | 2 | - | 80 | 8 | 31 | - | 5 | - | - | 126 |
| **MEDULLARY** | - | - | 33 | 1 | - | - | - | - | - | 34 |
| **METAPLASTIC CARCINOMA** | - | - | 1 | 2 | - | - | - | - | 2 | 5 |
| **MICROPAPILLARY** | - | - | 16 | - | - | 7 | - | 1 | - | 24 |
| **MICROPAPILLARY & NST** | - | - | 21 | - | - | 2 | 1 | 1 | - | 25 |
| **MIXED NST-ILC** | 1 | - | 91 | 3 | 4 | - | 8 | - | - | 107 |
| **MUCINOUS** | - | - | 22 | - | - | 1 | - | 19 | 1 | 43 |
| **Total** | 75 | 1 | 5049 | 39 | 46 | 30 | 24 | 27 | 11 | 5302 |

Legend:Invasive carcinoma of no special type (NST), Invasive Lobular Breast carcinoma (ILC), Mixed ductal and lobular breast carcinoma (Mixed NST-ILC).

**Table S2. Clinicopathological Features by Histological Subgroup.**

Summary of clinicopathological characteristics by histological subtype, for those not included in **Table 1**. Features were compared pairwise against NST (taken as reference group), with adjustments for multiple testing by using the Bonferroni method: statistical significance was set at P < 0.008 (0.05/6). Absolute numbers are reported, with corresponding percentages in parentheses, calculated relative to the number of cases within each histological subtype.

|  | **NST n=5981 (96.2%)** | **APOCRINE n=77 (1.2%)** | **MIXED NST-ILC n=58 (0.9%)** | **MICROPAPILLARY n=36 (0.6%)** | **MUCINOUS n=35 (0.6%)** | **CRIBRIFORM n=22 (0.4%)** | **METAPLASTIC n=11 (0.2%)** |
| --- | --- | --- | --- | --- | --- | --- | --- |
| **Age at diagnosis** |  |  |  |  |  |  |  |
| N | 5981 | 77 | 58 | 36 | 35 | 22 | 11 |
| Mean (SD) | 50.9 (10.26) | 49.3 (10.03) | 50.0 (9.74) | 53.5 (9.17) | 48.9 (10.93) | 46.2 (9.55) | 55.6 (10.94) |
| Median (IQR) | 51.0 (44.0, 58.0) | 48.0 (42.0, 57.0) | 49.5 (44.0, 56.0) | 52.5 (46.5, 62.0) | 49.0 (41.0, 57.0) | 48.0 (37.0, 53.0) | 54.0 (51.0, 63.0) |
| Range | 18.0 - 80.0 | 31.0 - 71.0 | 25.0 - 69.0 | 37.0 - 72.0 | 24.0 - 72.0 | 33.0 - 68.0 | 35.0 - 75.0 |
| P.value (NST vs rST) | Reference | 0.13 | 0.43 | 0.16 | 0.23 | 0.03 | 0.13 |
| **Sex,** n (%) |  |  |  |  |  |  |  |
| Female  Male | 5974 (99.9%)  7 (0.1%) | 77 (100.0%)  0 (0.0%) | 58 (100.0%)  0 (0.0%) | 36 (100.0%)  0 (0.0%) | 22 (100.0%)  0 (0.0%) | 35 (100.0%)  0 (0.0%) | 11 (100.0%)  0 (0.0%) |
| P.value (ductal vs rST) | Reference | 1 | 1 | 1 | 1 | 1 | 1 |
| **Pooled Race Group,** n (%) |  |  |  |  |  |  |  |
| Asian  Black  Other  White  Missing | 1598 (26.7%)  86 (1.4%)  184 (3.1%)  4112 (68.8%)  1 | 15 (19.5%)  1 (1.3%)  3 (3.9%)  58 (75.3%)  0 | 7 (12.1%)  0 (0.0%)  1 (1.7%)  50 (86.2%)  0 | 5 (13.9%)  0 (0.0%)  2 (5.6%)  29 (80.6%)  0 | 10 (28.6%)  2 (5.7%)  3 (8.6%)  20 (57.1%)  0 | **1 (4.5%)**  **4 (18.2%)**  **0 (0.0%)**  **17 (77.3%)**  **0** | 5 (45.5%)  0 (0.0%)  0 (0.0%)  6 (54.5%)  0 |
| P.value (NST vs rST) | Reference | 0.44 | 0.04 | 0.22 | 0.03 | **<0.001** | 0.52 |
|  |  |  |  |  |  |  |  |
| **Region,** n (%) |  |  |  |  |  |  |  |
| North America  South America  Europe  Asia Pacific and South Africa | 626 (10.5%)  317 (5.3%)  3210 (53.7%)  1828 (30.6%) | 3 (3.9%)  4 (5.2%)  53 (68.8%)  17 (22.1%) | **30 (51.7%)**  **2 (3.4%)**  **18 (31.0%)**  **8 (13.8%)** | 6 (16.7%)  1 (2.8%)  19 (52.8%)  10 (27.8%) | **7 (20.0%)**  **5 (14.3%)**  **10 (28.6%)**  **13 (37.1%)** | **21 (95.5%)**  **0 (0.0%)**  **1 (4.5%)**  **0 (0.0%)** | 0 (0.0%)  0 (0.0%)  6 (54.5%)  5 (45.5%) |
| P.value (NST vs rST) | Reference | 0.04 | **<0.001** | 0.66 | **0.004** | **<0.001** | 0.66 |
| **BMI** |  |  |  |  |  |  |  |
| Mean (SD)  Median (IQR)  Range | 26.3 (5.29)  25.3 (22.6, 29.0)  14.1, 75.2 | 26.9 (5.46)  26.1 (23.2, 28.3)  17.9, 40.6 | 25.7 (4.36)  25.3 (22.5, 28.0)  18.5, 42.8 | 28.1 (6.72)  26.7 (23.9, 30.1)  19.4, 52.3 | 27.1 (6.11)  27.3 (21.8, 32.0)  16.0, 41.8 | 25.9 (5.15)  25.1 (22.3, 27.8)  18.0, 39.8 | 25.6 (5.22)  24.0 (22.3, 28.9)  20.3, 39.0 |
| P.value (ductal vs rST) | Reference | 0.63 | 0.31 | 0.10 | 0.73 | 0.48 | 0.54 |
| **BMI class,** n (%) |  |  |  |  |  |  |  |
| Normal/underweight  Overweight/obese  Missing | 2835 (47.4%)  3141 (52.6%)  5 | 35 (45.5%) | 21 (36.8%)  36 (63.2%)  1 | 14 (38.9%)  22 (61.1%)  0 | 17 (50.0%)  17 (50.0%)  1 | 9 (40.9%)  13 (59.1%)  0 | 7 (63.6%)  4 (36.4%)  0 |
| 42 (54.5%) |
| 0 |
| P.value (ductal vs rST) | Reference | 0.73 | 0.11 | 0.30 | 0.77 | 0.54 | 0.37 |
| **Menopausal status at baseline,** n (%) |  |  |  |  |  |  |  |
| Postmenopausal or male | 3367 (56.3%) | 38 (49.4%) | 31 (53.4%) | 22 (61.1%) | 16 (45.7%) | 9 (40.9%) | 8 (72.7%) |
| Premenopausal | 2614 (43.7%) | 39 (50.6%) | 27 (46.6%) | 14 (38.9%) | 19 (54.3%) | 13 (59.1%) | 3 (27.3%) |
| P.value (NST vs rST) | Reference | 0.22 | 0.66 | 0.56 | 0.21 | 0.15 | 0.37 |
| **Tumor size (T class),** n (%) |  |  |  |  |  |  |  |
| >2cm | 3260 (54.7%) | 41 (53.9%) | 34 (58.6%) | 14 (38.9%) | 19 (55.9%) | 6 (27.3%) | 9 (81.8%) |
| ≤2cm | 2697 (45.3%) | 35 (46.1%) | 24 (41.4%) | 22 (61.1%) | 15 (44.1%) | 16 (72.7%) | 2 (18.2%) |
| Missing | 24 | 1 | 0 | 0 | 1 | 0 | 0 |
| P.value (NST vs rST) | Reference | 0.89 | 0.55 | 0.06 | 0.89 | 0.009 | 0.13 |
| **Type of surgery,** n (%) |  |  |  |  |  |  |  |
| Mastectomy | 3262 (54.6%) | 39 (50.6%) | 40 (69.0%) | 25 (69.4%) | 20 (57.1%) | 10 (45.5%) | 9 (81.8%) |
| Tumorectomy | 2717 (45.4%) | 38 (49.4%) | 18 (31.0%) | 11 (30.6%) | 15 (42.9%) | 12 (54.5%) | 2 (18.2%) |
| Missing | 2 | 0 | 0 | 0 | 0 | 0 | 0 |
| P.value (NST vs rST) | Reference | 0.49 | 0.03 | 0.07 | 0.76 | 0.39 | 0.13 |
| **Adjuvant Radiotherapy,** n (%) |  |  |  |  |  |  |  |
| No | 1720 (28.8%) | 12 (15.6%) | 18 (31.0%) | 12 (33.3%) | 15 (42.9%) | 7 (31.8%) | 5 (45.5%) |
| Yes | 4261 (71.2%) | 65 (84.4%) | 40 (69.0%) | 24 (66.7%) | 20 (57.1%) | 15 (68.2%) | 6 (54.5%) |
| P.value (NST vs rST) | Reference | 0.007 | 0.71 | 0.55 | 0.08 | 0.75 | 0.31 |
| **Neo-adjuvant Chemotherapy,** n (%) |  |  |  |  |  |  |  |
| No | 5475 (91.5%) | 68 (88.3%) | 58 (100.0%) | 36 (100.0%) | 34 (97.1%) | 22 (100.0%) | 11 (100.0%) |
| Yes | 506 (8.5%) | 9 (11.7%) | 0 (0.0%) | 0 (0.0%) | 1 (2.9%) | 0 (0.0%) | 0 (0.0%) |
| P.value (NST vs rST) | Reference | 0.30 | 0.01 | 0.07 | 0.36 | 0.25 | 0.62 |
| **Adjuvant chemotherapy Timing (compared with anti-HER2 treatment),** n (%) |  |  |  |  |  |  |  |
| Concurrent | 2662 (44.5%) | 40 (51.9%) | **43 (74.1%)** | 22 (61.1%) | 16 (45.7%) | **22 (100.0%)** | 3 (27.3%) |
| Sequential | 3319 (55.5%) | 37 (48.1%) | **15 (25.9%)** | 14 (38.9%) | 19 (54.3%) | **0 (0.0%)** | 8 (72.7%) |
| P.value (NST vs rST) | Reference | 0.19 | **<0.001** | 0.05 | 0.89 | **<0.001** | 0.37 |
| **Adjuvant ET,** n (%) |  |  |  |  |  |  |  |
| No | 2541 (42.5%) | **60 (77.9%)** | **10 (17.2%)** | 15 (41.7%) | 12 (34.3%) | 4 (18.2%) | 8 (72.7%) |
| Yes | 3440 (57.5%) | **17 (22.1%)** | **48 (82.8%)** | 21 (58.3%) | 23 (65.7%) | 18 (81.8%) | 3 (27.3%) |
| P.value (NST vs rST) | Reference | **<0.001** | **<0.001** | 0.92 | 0.32 | 0.02 | 0.06 |
| **Trial planned treatment,** n (%) |  |  |  |  |  |  |  |
| Trastuzumab concomitant with Lapatinib | 1986 (33.2%) | 29 (37.7%) | 18 (31.0%) | 15 (41.7%) | 11 (31.4%) | **14 (63.6%)** | 4 (36.4%) |
| Trastuzumab alone | 2005 (33.5%) | 29 (37.7%) | 22 (37.9%) | 10 (27.8%) | 12 (34.3%) | **1 (4.5%)** | 4 (36.4%) |
| Trastuzumab followed by Lapatinib | 1990 (33.3%) | 19 (24.7%) | 18 (31.0%) | 11 (30.6%) | 12 (34.3%) | **7 (31.8%)** | 3 (27.3%) |
| P.value (NST vs rST) | Reference | 0.26 | 0.78 | 0.56 | 0.98 | **0.001** | 0.93 |

Legend: Absolute number (n/N), percentage (%), rare special histological subtype (rST), Invasive carcinoma of no special type (NST), Invasive Lobular Breast carcinoma (ILC), Mixed ductal and lobular breast carcinoma (Mixed NST-ILC), Body mass index (BMI), Standard Deviation (SD), Interquartile Range (IQR) , Human Epidermal Growth Factor Receptor 2 (HER2).

**Table S3. DFS multivariate analysis**

Multivariate Cox regression was used to assess the independent association of each histological subtype with DFS. HR with corresponding 95% CI and p-values from Wald tests are reported to assess the strength and statistical significance of each association.

|  | | | |
| --- | --- | --- | --- |
|  | **Events/Total** | **Hazard Ratio (95% CI)** | **P-value1** |
|  | 1162/6169 |  |  |
| **Histology** |  |  |  |
| NST | 1125/5933 | Reference |  |
| Mixed NST-ILC | 8/58 | 0.91 (0.45-1.84) | 0.7934 |
| Apocrine | 15/76 | 0.99 (0.59-1.66) | 0.9763 |
| Micropapillary | 5/36 | 0.80 (0.33-1.92) | 0.6123 |
| Cribriform | 4/22 | 1.84 (0.68-5.00) | 0.2300 |
| Mucinous | 3/33 | 0.52 (0.17-1.62) | 0.2579 |
| Metaplastic | 2/11 | 0.96 (0.24-3.86) | 0.9551 |
| **Menopausal status at baseline** |  |  |  |
| Postmenopausal or male | 669/3466 | Reference |  |
| Premenopausal | 493/2703 | 0.90 (0.79-1.02) | 0.1066 |
| **Tumor Size (T class)** |  |  |  |
| ≤ 2 cm | 442/2794 | Reference |  |
| > 2 cm | 720/3375 | 1.28 (1.13-1.44) | <.0001 |
| **Lymph node involvement (N class)** |  |  |  |
| 0 | 315/2487 | Reference |  |
| 1 | 297/1804 | 1.34 (1.14-1.57) | 0.0003 |
| 2 | 397/1364 | 2.43 (2.09-2.83) | <.0001 |
| Not applicable (Neoadjuvant chemotherapy) | 153/514 | 2.59 (2.13-3.16) | <.0001 |
| **Histological Grade** |  |  |  |
| Well or moderately differentiated | 434/2428 | Reference |  |
| Poorly differentiated, undifferentiated or cannot be assessed | 728/3741 | 1.07 (0.95-1.21) | 0.2869 |
| **Hormone receptor status** |  |  |  |
| ER and/or PgR positive | 642/3535 | Reference |  |
| ER and PgR negative | 520/2634 | 0.80 (0.66-0.98) | 0.0271 |
| **Adjuvant Chemotherapy type** |  |  |  |
| No | 712/3379 | Reference |  |
| Taxane only | 403/2470 | 0.76 (0.67-0.86) | <.0001 |
| Taxane + Carboplatin | 47/320 | 0.84 (0.62-1.14) | 0.2636 |
| **Adjuvant ET type** |  |  |  |
| No ET | 532/2621 | Reference |  |
| SERM only | 265/1317 | 0.88 (0.70-1.09) | 0.2439 |
| AI only | 194/1108 | 0.65 (0.52-0.83) | 0.0004 |
| SERM+AI only | 60/467 | 0.46 (0.33-0.62) | <.0001 |
| LHRH/oophorectomy | 111/656 | 0.67 (0.52-0.86) | 0.0016 |
| **Trial planned treatment** |  |  |  |
| Trastuzumab alone | 416/2064 | Reference |  |
| Trastuzumab concomitant with Lapatinib | 370/2058 | 0.89 (0.78-1.03) | 0.1185 |
| Trastuzumab followed by Lapatinib | 376/2047 | 0.91 (0.79-1.05) | 0.1897 |
| 1Covariate Wald p-value; | | | |

Legend: disease-free survival (DFS); hazard ratio (HR); 95% confidence

interval (95% CI), ), Invasive carcinoma of no special type (NST), Invasive Lobular Breast carcinoma (ILC), Mixed ductal and lobular breast carcinoma (Mixed NST-ILC), Estrogen Receptor (ER), Progesterone Receptor (PgR), Endocrine therapy (ET), Selective Estrogen Receptor Modulator (SERM), Aromatase Inhibitor (AI), Luteinizing Hormone-Releasing Hormone analogue (LHRH).


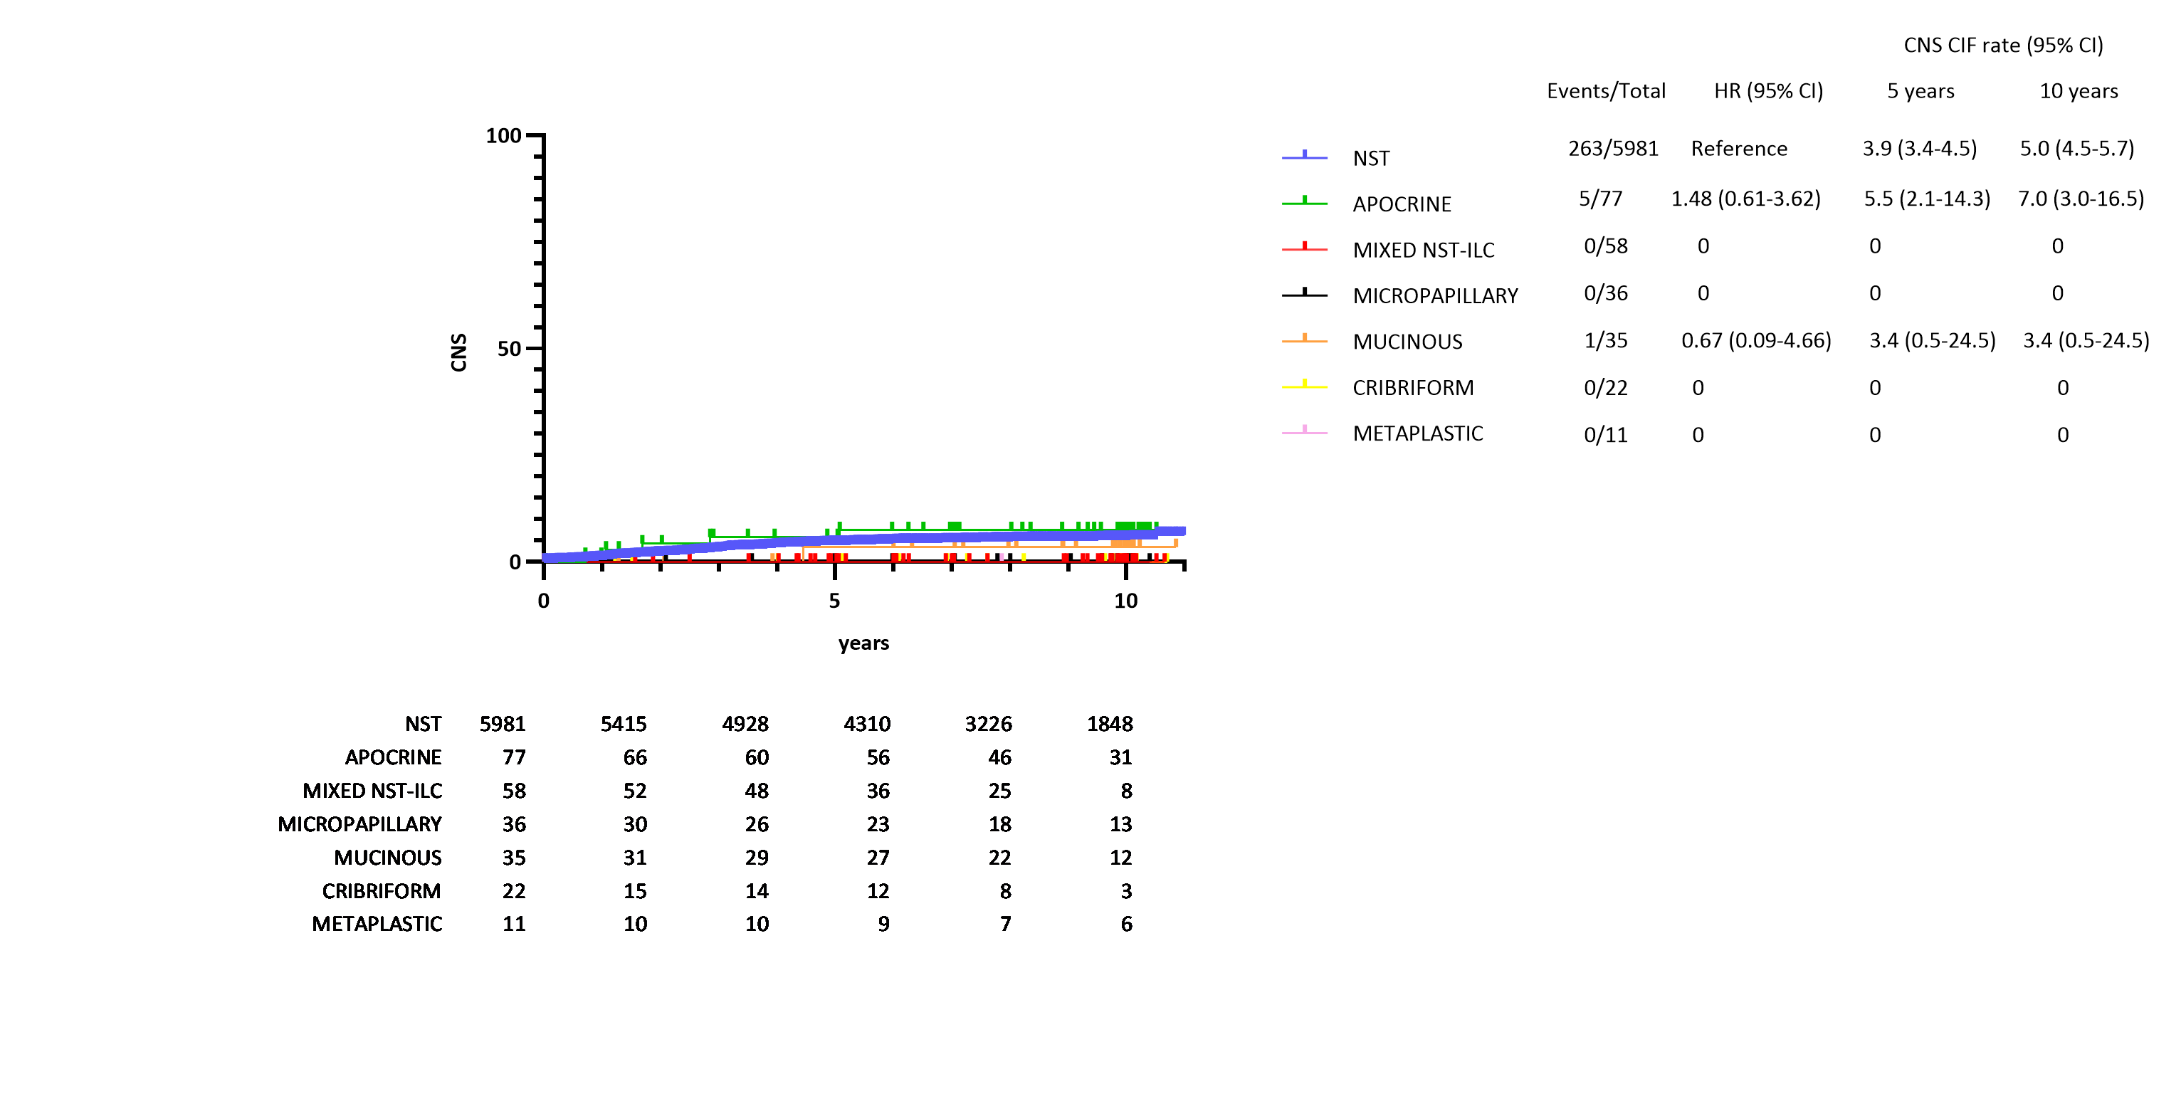


**Figure S1. CNS Relapse by Histological Subtype.**
Cumulative incidence curves of CNS relapse by histological subtype, with each curve color-coded as per the legend below. Number of events, HR (95% CI), and CIF rate at 5 and 10 years are reported.

Legend: Central nervous system (CNS); hazard ratio (HR); 95% confidence interval (95% CI); Cumulative Incidence Function (CIF), Invasive carcinoma of no special type (NST), Invasive Lobular Breast carcinoma (ILC), Mixed ductal and lobular breast carcinoma (Mixed NST-ILC).

**
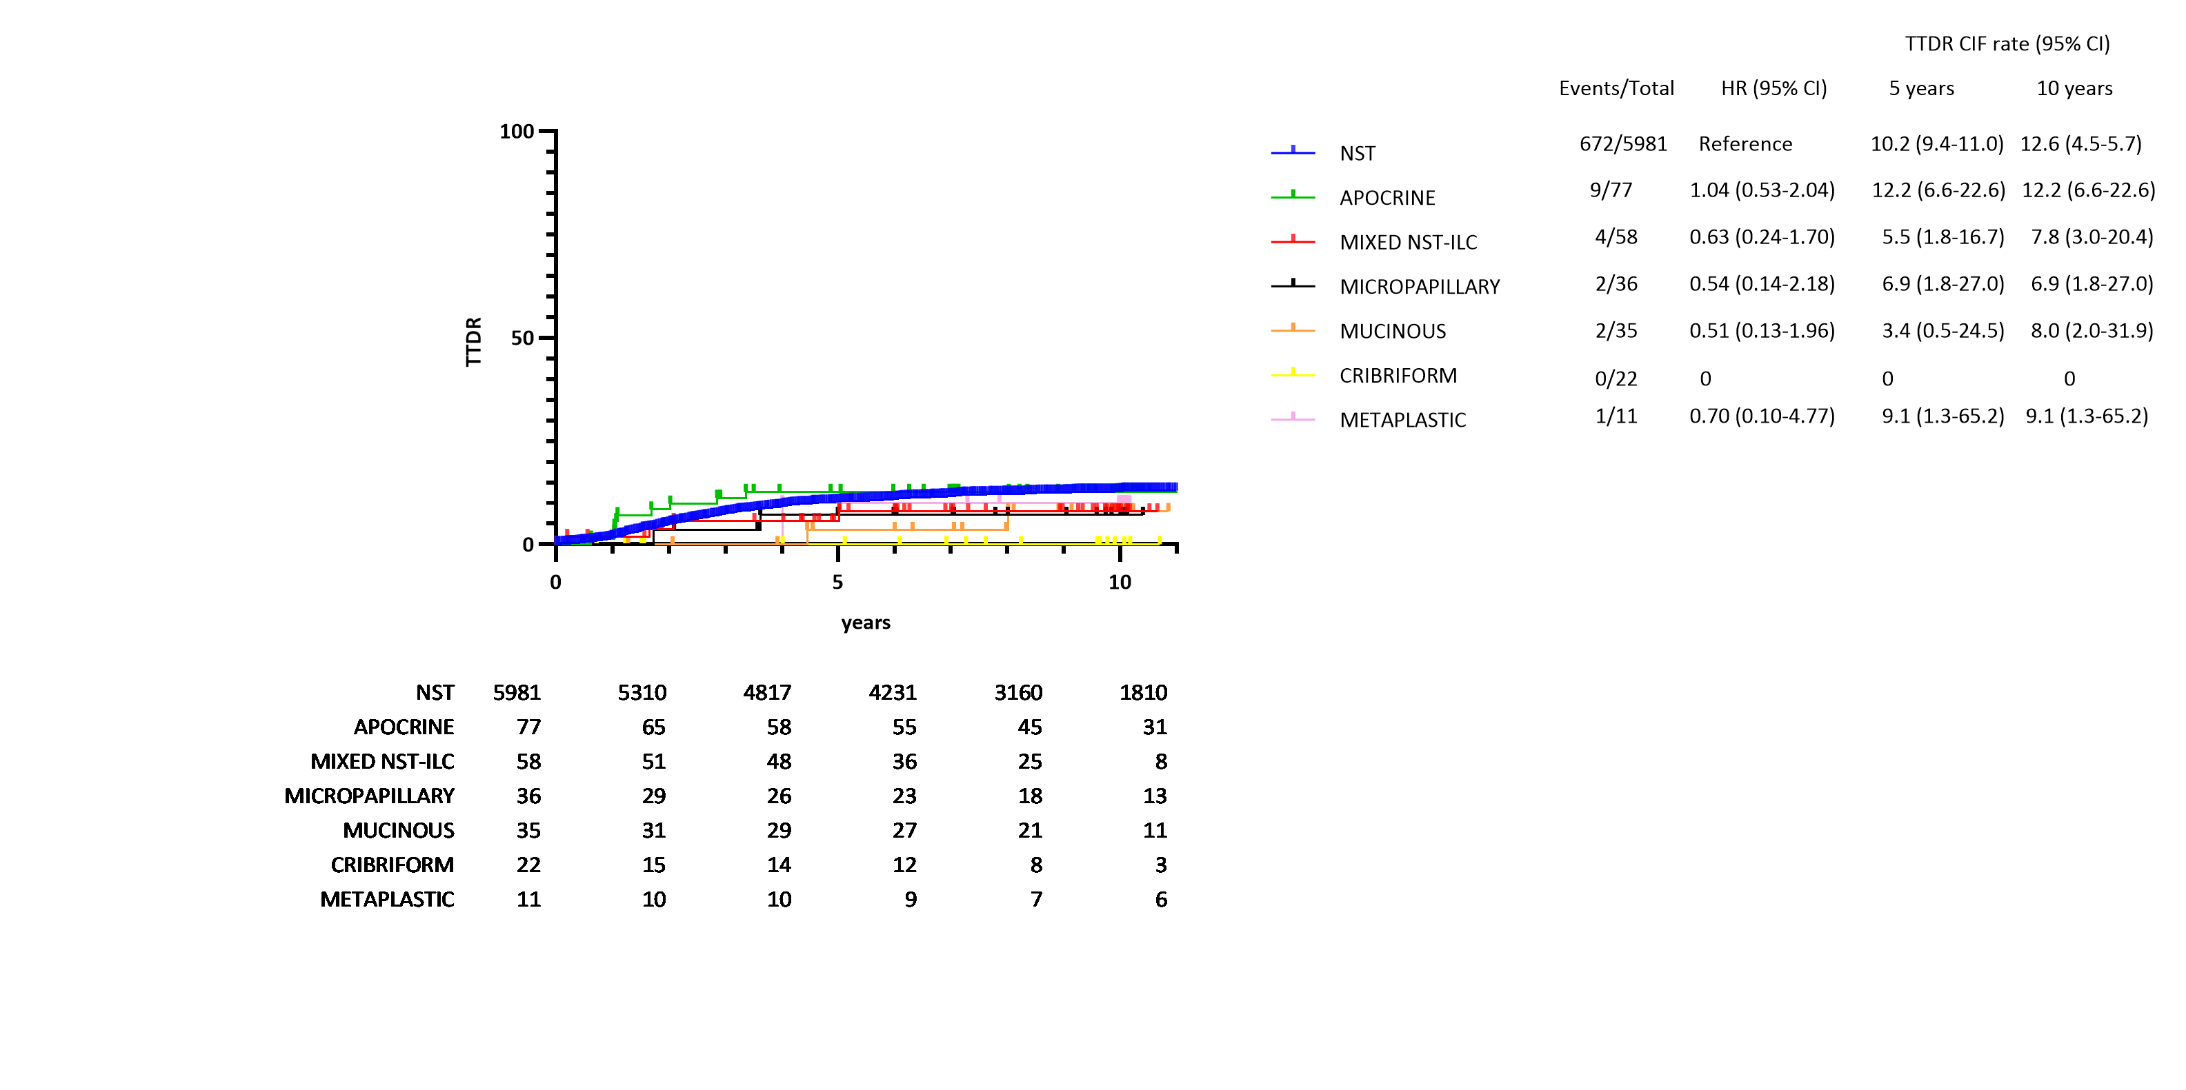
Figure S2. TTDR by Histological Subtype.**
Cumulative incidence curves of TTDR by histological subtype, with each curve color-coded as per the legend below. Number of events, HR (95% CI), and CIF rate at 5 and 10 years are reported.

Legend: Time to distant relapse (TTDR); hazard ratio (HR); 95% confidence interval (95% CI); Cumulative Incidence Function (CIF), Invasive carcinoma of no special type (NST), Invasive Lobular Breast carcinoma (ILC), Mixed ductal and lobular breast carcinoma (Mixed NST-ILC),

**Table S4. TTDR** **Events by Histological Subgroup.**

Summary of the number, type, and distribution of TTDR events observed across different histological subtypes.

|  | **NST** | **Mixed NST-ILC** | **APOCRINE** | **MICROPAPILLARY** | **MUCINOUS** | **METAPLASTIC** |
| --- | --- | --- | --- | --- | --- | --- |
| **CNS recurrence** | 128 | 0 | 3 | 0 | 1 | 0 |
| **Distant bone recurrence** | 167 | 2 | 1 | 0 | 0 | 0 |
| **Distant visceral recurrence** | 298 | 2 | 4 | 2 | 1 | 1 |
| **Other distant recurrence**  **(assumed soft tissue)** | 79 | 0 | 1 | 0 | 0 | 0 |
| **Total** | 672 | 4 | 9 | 2 | 2 | 1 |

Legend:Central Nervous System (CNS), Invasive carcinoma of no special type (NST), Invasive Lobular Breast carcinoma (ILC), Mixed ductal and lobular breast carcinoma (Mixed NST-ILC).
